# Supplementary material for: Photochemical isomerization of aryl hydrazones of 1,2,4-oxadiazole derivatives into the corresponding triazoles
Source: Royal Society of Chemistry journal article supplement (doi:10.1039/c2pp25073j), 2012-05-23
Supplement: c2pp25073j.pdf [file c2pp25073j.pdf]

# Photochemical isomerisation of aryl hydrazones of 1,2,4-oxadiazole derivatives into the corresponding triazoles.

Maurizio D'Auria,<sup>\*[a]</sup> Vincenzo Frenna,<sup>[b]</sup> Salvatore Marullo,<sup>[b]</sup> Rocco Racioppi,<sup>[a]</sup> Domenico Spinelli,<sup>[c]</sup> and Licia Viggiani<sup>[a]</sup>

## <sup>1</sup>H NMR 2a

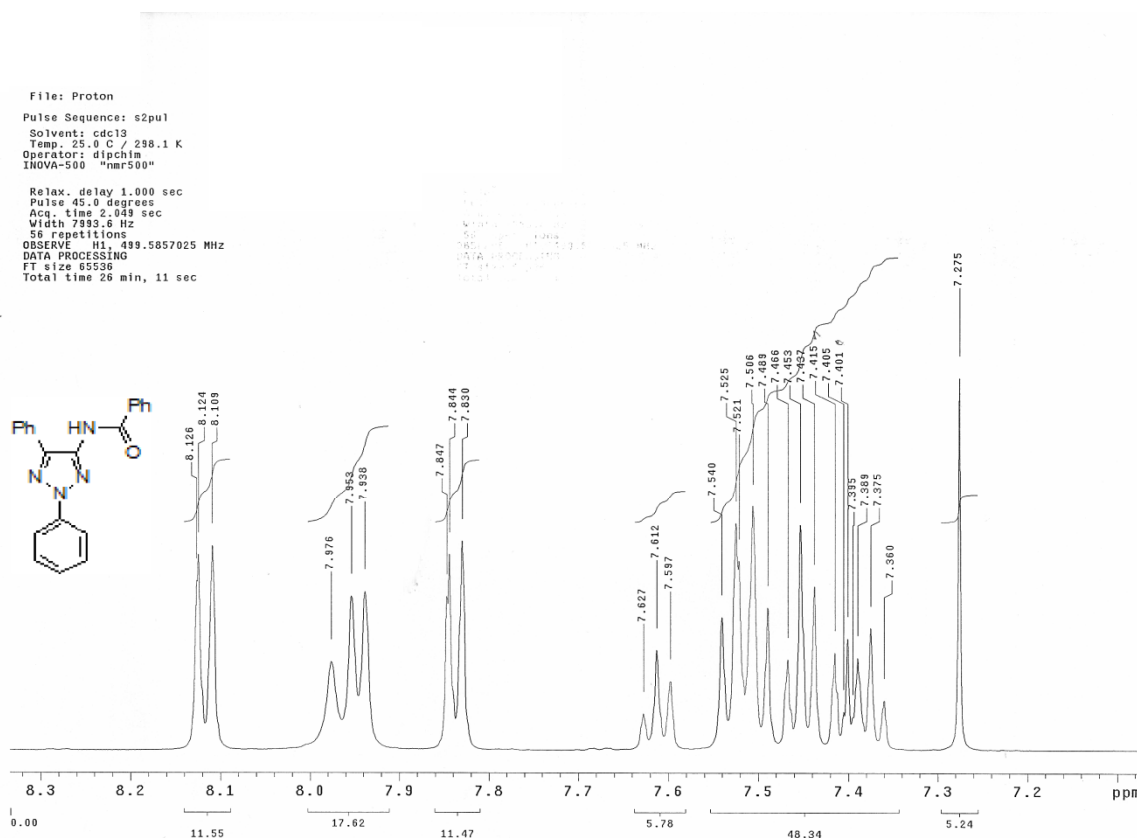

<sup>13</sup>C NMR 2a

File: fr11-25\_040209\_c\_001

Pulse Sequence: s2pul

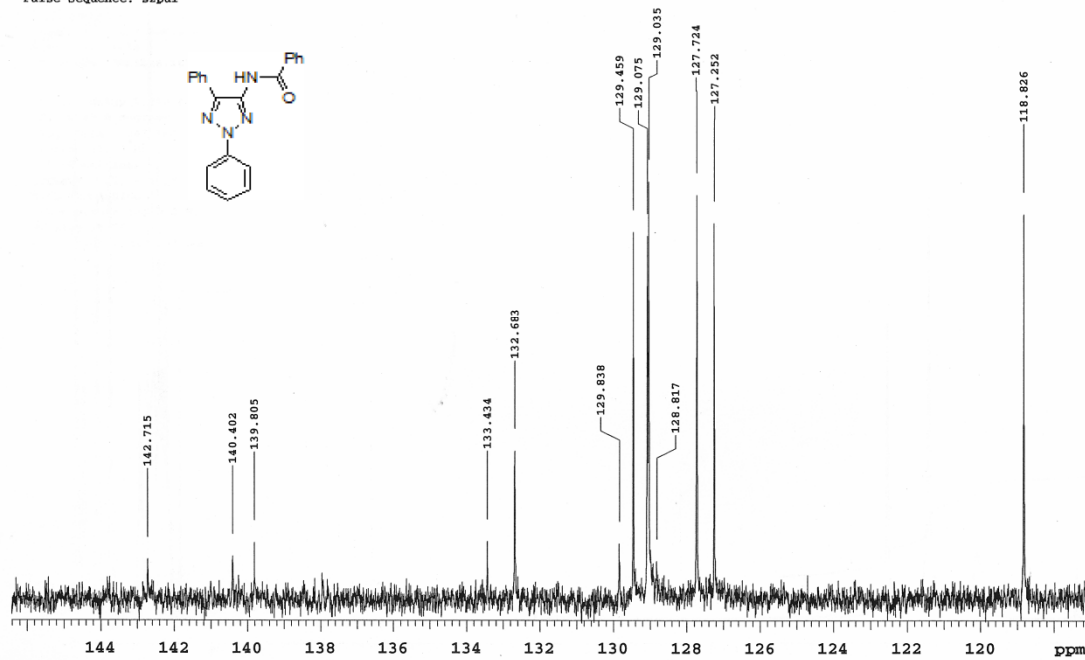

# <sup>1</sup>H NMR 2c

Std proton  
spinelli\_2\_090310  
File: Proton  
Pulse Sequence: s2pul

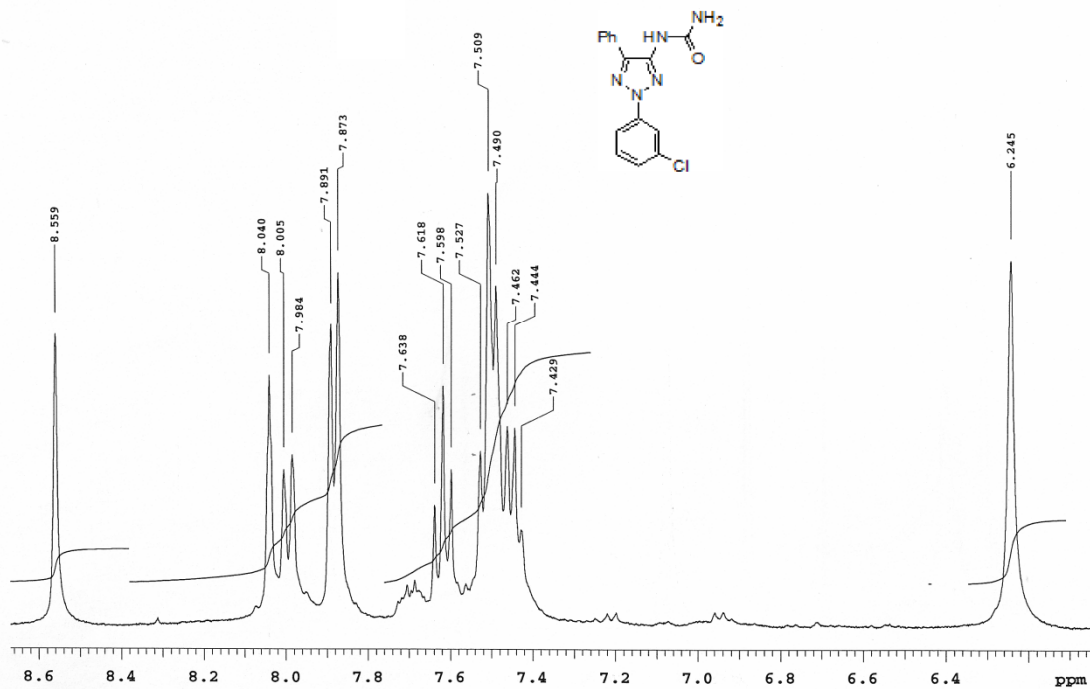

<sup>13</sup>C NMR 2c

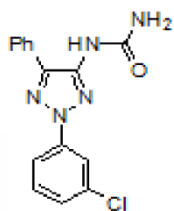

File: Carbon

Pulse Sequence: s2pul  
Solvent: d2o  
Temp. 25.0 C / 298.1 K  
Operator: licia  
VNMR5-400 "unibas.it"

Relax. delay 1.000 sec  
Pulse 45.0 degrees  
Acq. time 1.301 sec  
Width 26595.7 Hz  
20000 repetitions  
OBSERVE C13, 100.5695391 MHz  
DECOUPLE H1, 399.9601753 MHz  
Power 40 dB  
continuously on  
WALTZ-16 modulated  
DATA PROCESSING  
Line broadening 2.0 Hz  
FT size 131072  
Total time 12 hr, 49 min, 48 sec

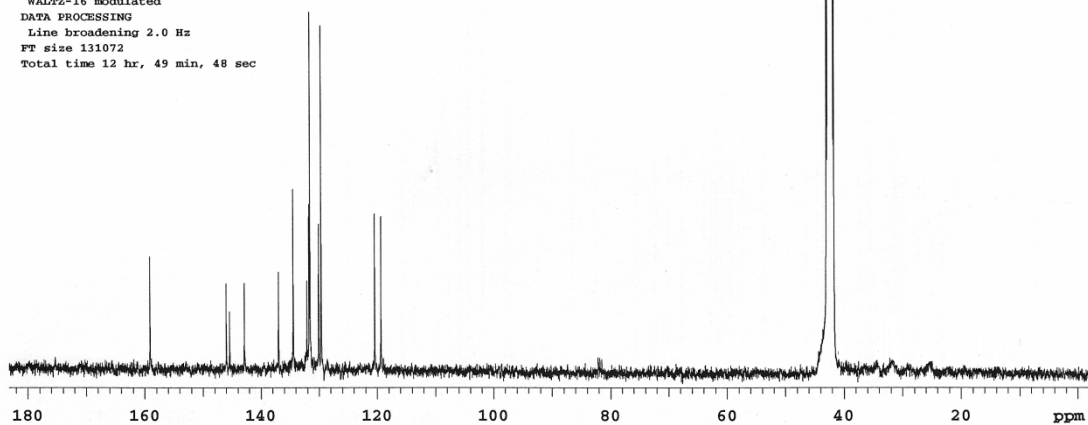

<sup>1</sup>H NMR 2d

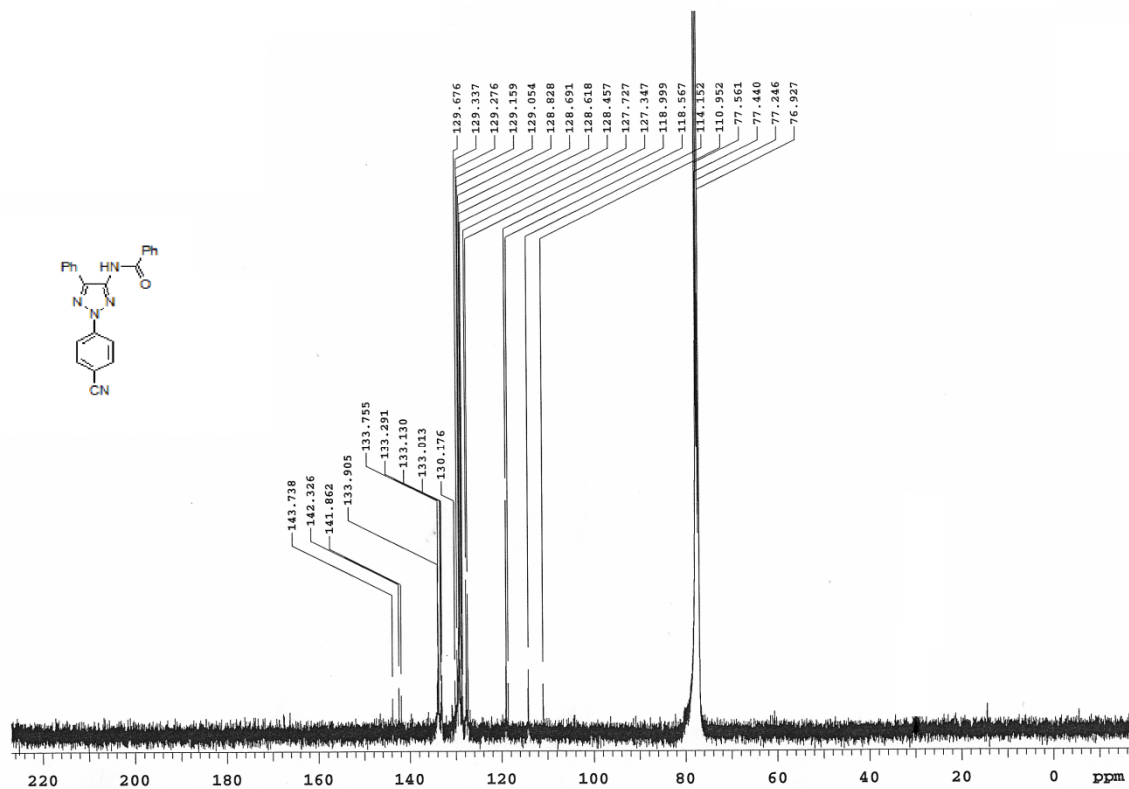

<sup>1</sup>H NMR 2e

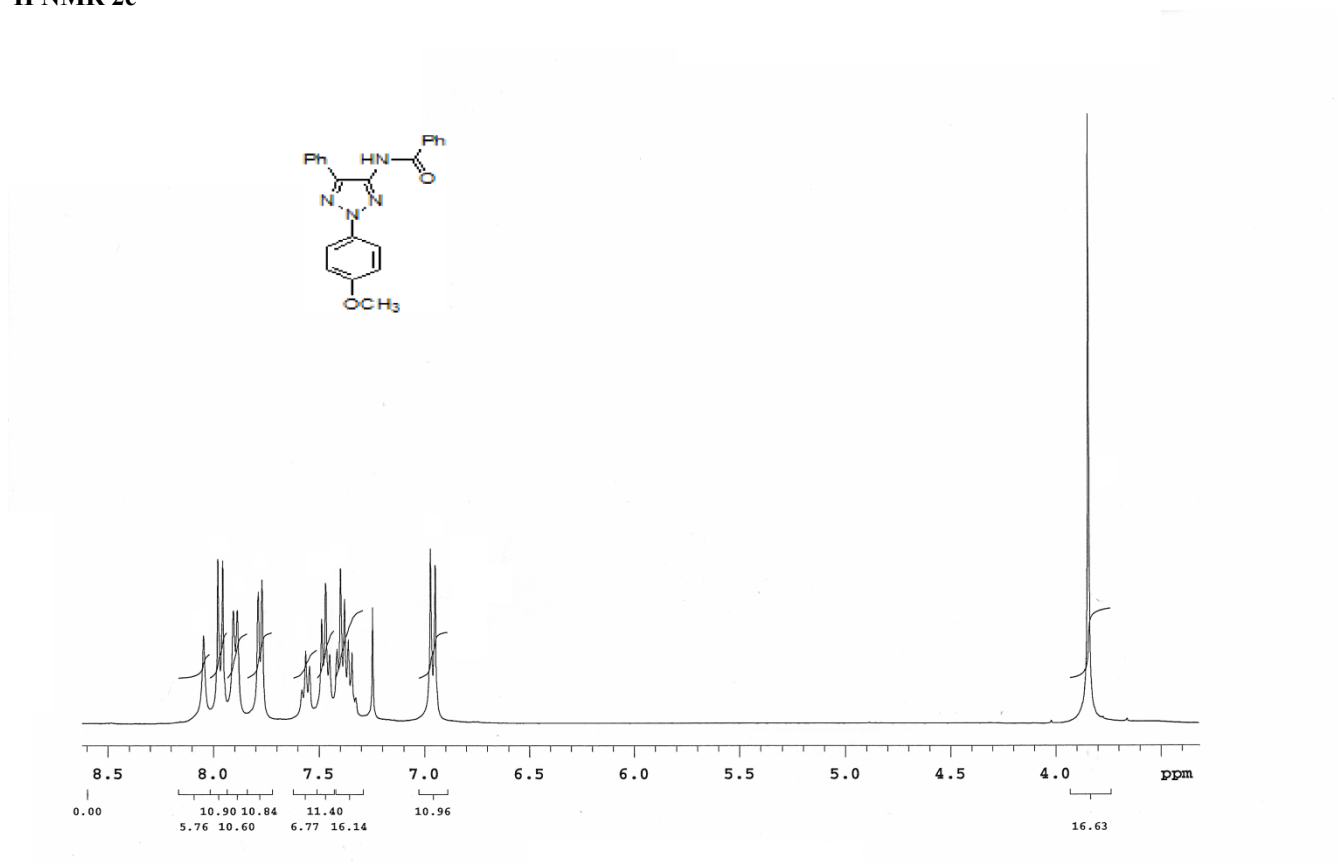

<sup>13</sup>C NMR 2e

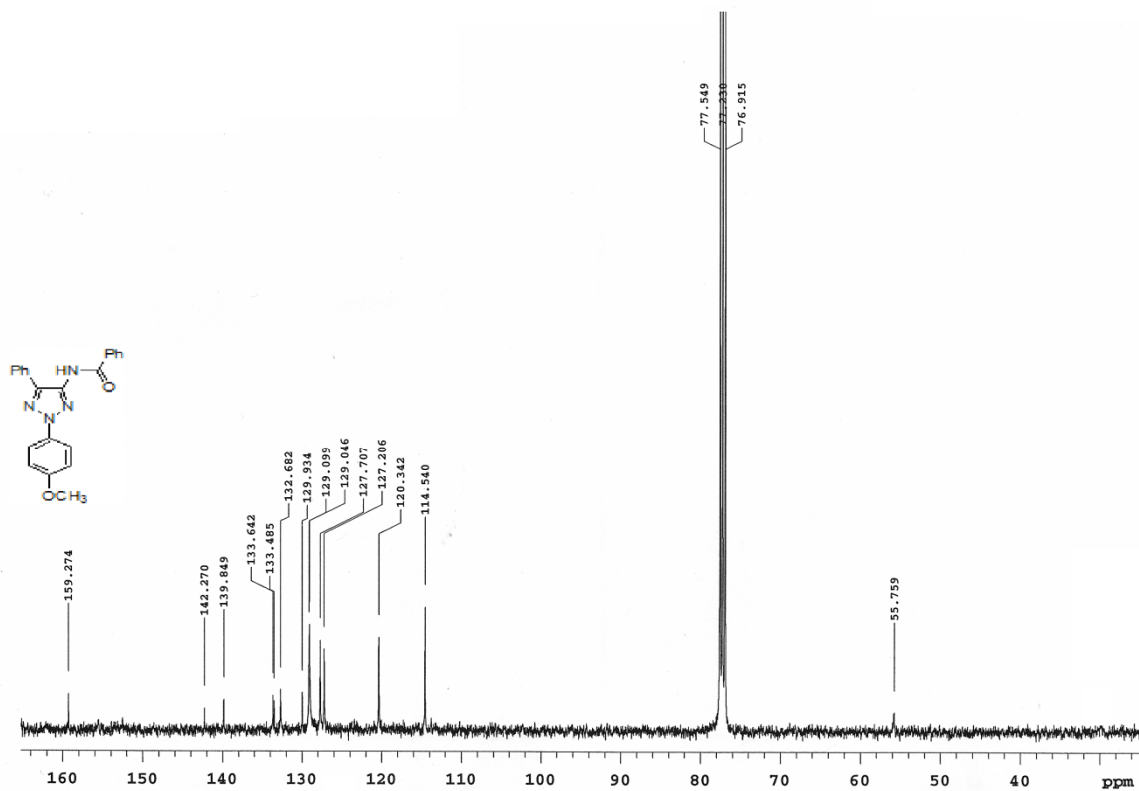

<sup>1</sup>H NMR 3

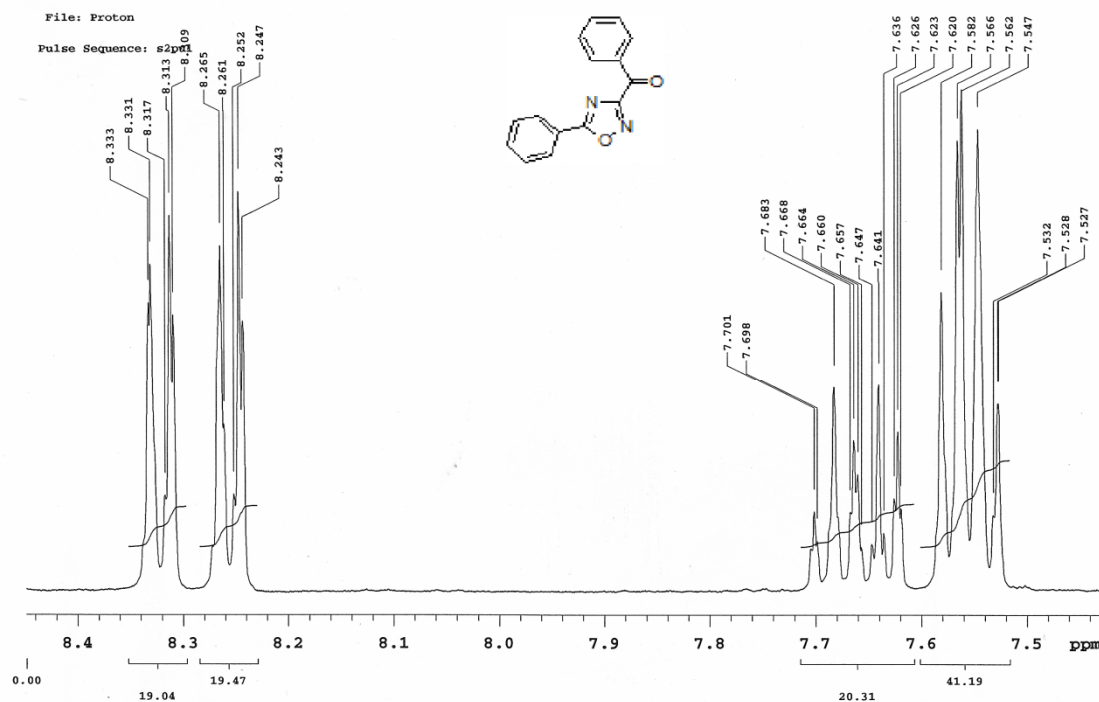



<sup>13</sup>C NMR 3

roc

File: Carbon

Pulse Sequence: s2pul

Solvent: cdcl3

Temp. 25.0 C / 298.1 K

Operator: licia

VNMRS-400 "unibas.it"

Relax. delay 1.000 sec

Pulse 45.0 degrees

Acq. time 1.301 sec

Width 26595.7 Hz

20000 repetitions

OBSERVE C13, 100.5692807 MHz

DECOUPLE H1, 399.9591474 MHz

Power 40 dB

continuously on

WALTZ-16 modulated

DATA PROCESSING

Line broadening 0.5 Hz

FT size 131072

Total time 12 hr. 49 min. 48 sec

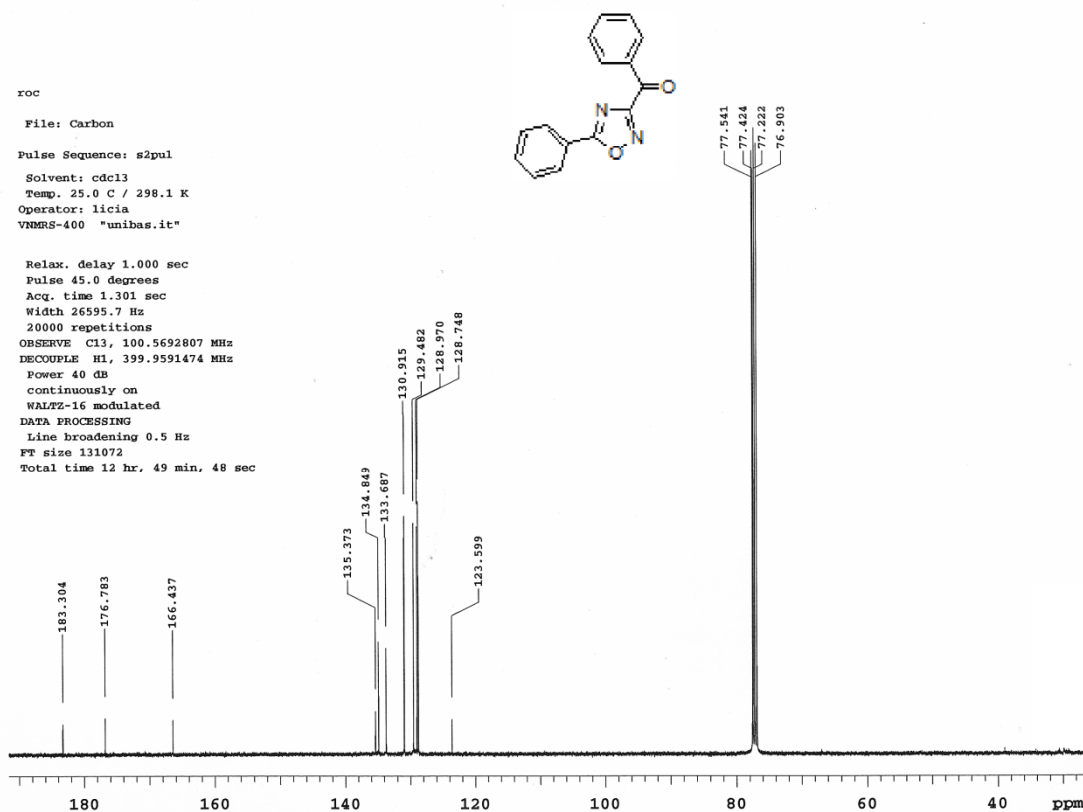

**Compound 1a**

Total energy -1104-10439582 H

Atom list:

| Tag | Symbol | NA | NB | NC | Bond      | Angle       | Dihedral     | X          | Y          | Z          |
|-----|--------|----|----|----|-----------|-------------|--------------|------------|------------|------------|
| 1   | C      |    |    |    |           |             |              | -0.6268090 | -0.5396090 | 0.1697700  |
| 2   | N      | 1  |    |    | 1.3798206 |             |              | -1.8361390 | 0.0776090  | -0.0761320 |
| 3   | C      | 2  | 1  |    | 1.3058198 | 102.9139192 |              | -2.6961740 | -0.8922640 | 0.0815120  |
| 4   | O      | 3  | 2  | 1  | 1.3475129 | 112.6769748 | 0.2474876    | -2.1085430 | -2.0592250 | 0.4111830  |
| 5   | N      | 1  | 2  | 3  | 1.3203710 | 114.2912730 | -0.7587914   | -0.7233370 | -1.8193220 | 0.4802480  |
| 6   | C      | 3  | 2  | 1  | 1.4622811 | 128.2018589 | -179.7737239 | -4.1511400 | -0.8419290 | -0.0556240 |
| 7   | C      | 1  | 5  | 4  | 1.4708077 | 123.8777415 | -179.0547403 | 0.6476510  | 0.1897230  | 0.0854980  |
| 8   | N      | 7  | 1  | 5  | 1.2994367 | 116.5039885 | 15.2669299   | 1.7265210  | -0.5324600 | 0.0304810  |
| 9   | C      | 7  | 1  | 5  | 1.4957346 | 118.8443915 | -163.9462743 | 0.6246310  | 1.6852800  | 0.0866610  |
| 10  | N      | 8  | 7  | 1  | 1.3310151 | 120.2528252 | -177.2688089 | 2.9230290  | 0.0501560  | 0.0074930  |
| 11  | C      | 10 | 8  | 7  | 1.4008218 | 121.4143625 | 179.6668879  | 4.1018540  | -0.7047920 | -0.0447260 |
| 12  | C      | 11 | 10 | 8  | 1.4035232 | 121.7701339 | 1.3141831    | 4.0794550  | -2.1069410 | -0.1026380 |
| 13  | C      | 12 | 11 | 10 | 1.3945969 | 119.3464025 | 179.9101017  | 5.2838000  | -2.8081640 | -0.1549830 |
| 14  | C      | 13 | 12 | 11 | 1.3989995 | 121.1289006 | -0.1018568   | 6.5117110  | -2.1377690 | -0.1528400 |
| 15  | C      | 14 | 13 | 12 | 1.3978533 | 119.1429482 | 0.0439707    | 6.5246850  | -0.7411240 | -0.0961980 |
| 16  | C      | 15 | 14 | 13 | 1.3944940 | 120.4971746 | -0.0178835   | 5.3299780  | -0.0238770 | -0.0428560 |
| 17  | C      | 6  | 3  | 2  | 1.4049618 | 119.1391379 | 0.0187821    | -4.7642250 | 0.3746060  | -0.3992620 |
| 18  | C      | 17 | 6  | 3  | 1.3934328 | 119.8872992 | -179.9032117 | -6.1497350 | 0.4407290  | -0.5320960 |
| 19  | C      | 18 | 17 | 6  | 1.3990814 | 120.2001972 | -0.0051742   | -6.9319070 | -0.7005450 | -0.3244200 |
| 20  | C      | 19 | 18 | 17 | 1.3982337 | 119.9743672 | -0.0261241   | -6.3230570 | -1.9120760 | 0.0169770  |
| 21  | C      | 20 | 19 | 18 | 1.3945375 | 120.2138927 | 0.0251669    | -4.9371230 | -1.9874400 | 0.1520400  |
| 22  | C      | 9  | 7  | 1  | 1.4052050 | 120.4597623 | -116.1787091 | 1.0752480  | 2.4055160  | -1.0326270 |
| 23  | C      | 22 | 9  | 7  | 1.3971659 | 120.5620266 | -179.2133257 | 1.0699880  | 3.8026630  | -1.0276040 |
| 24  | C      | 23 | 22 | 9  | 1.3974532 | 120.0980735 | 0.1041483    | 0.6164410  | 4.4977200  | 0.0967030  |
| 25  | C      | 24 | 23 | 22 | 1.3979707 | 119.7454978 | -0.1767373   | 0.1648030  | 3.7897090  | 1.2143190  |

|    |   |    |    |    |           |             |              |            |            |            |
|----|---|----|----|----|-----------|-------------|--------------|------------|------------|------------|
| 26 | C | 25 | 24 | 23 | 1.3959852 | 120.1884950 | 0.1155775    | 0.1685670  | 2.3937370  | 1.2095450  |
| 27 | H | 10 | 8  | 7  | 1.0172544 | 120.0603803 | 1.8136771    | 2.9975730  | 1.0632740  | 0.0608000  |
| 28 | H | 12 | 11 | 10 | 1.0832643 | 119.3814976 | -0.2892944   | 3.1274100  | -2.6237310 | -0.1025390 |
| 29 | H | 13 | 12 | 11 | 1.0863683 | 118.9551135 | 179.8873993  | 5.2590830  | -3.8934070 | -0.1977940 |
| 30 | H | 14 | 13 | 12 | 1.0854743 | 120.4604737 | -179.9743946 | 7.4426520  | -2.6944410 | -0.1943070 |
| 31 | H | 15 | 14 | 13 | 1.0862253 | 120.2140084 | 179.9686693  | 7.4681950  | -0.2029190 | -0.0930970 |
| 32 | H | 16 | 15 | 14 | 1.0876118 | 120.1008262 | 179.9232746  | 5.3476190  | 1.0626530  | 0.0023180  |
| 33 | H | 17 | 6  | 3  | 1.0847411 | 119.0936719 | 0.1243581    | -4.1450160 | 1.2510360  | -0.5577360 |
| 34 | H | 18 | 17 | 6  | 1.0858657 | 119.7008629 | -179.9962038 | -6.6204020 | 1.3825090  | -0.7978540 |
| 35 | H | 19 | 18 | 17 | 1.0860813 | 120.0246445 | 179.9941356  | -8.0115890 | -0.6457520 | -0.4286170 |
| 36 | H | 20 | 19 | 18 | 1.0857905 | 120.1208907 | -179.9692645 | -6.9277460 | -2.7993740 | 0.1782050  |
| 37 | H | 21 | 20 | 19 | 1.0847855 | 120.3804986 | -179.9837394 | -4.4619140 | -2.9260400 | 0.4165510  |
| 38 | H | 22 | 9  | 7  | 1.0867806 | 119.5261103 | 2.1205815    | 1.4097410  | 1.8682230  | -1.9160990 |
| 39 | H | 23 | 22 | 9  | 1.0862062 | 119.7300131 | -179.3946432 | 1.4120690  | 4.3457730  | -1.9038780 |
| 40 | H | 24 | 23 | 22 | 1.0861129 | 120.1218861 | -179.8971021 | 0.6106180  | 5.5838110  | 0.1003980  |
| 41 | H | 25 | 24 | 23 | 1.0861580 | 120.0918409 | -179.7402510 | -0.1928800 | 4.3242240  | 2.0895880  |
| 42 | H | 26 | 25 | 24 | 1.0860492 | 119.9761925 | -179.5796352 | -0.1894540 | 1.8471660  | 2.0770610  |

### Compound 1c

Total energy: -1332.60819518 H

#### Atom list:

| Tag | Symbol | NA | NB | NC | Bond      | Angle       | Dihedral     | X          | Y          | Z          |
|-----|--------|----|----|----|-----------|-------------|--------------|------------|------------|------------|
| 1   | C      |    |    |    |           |             |              | 1.8508940  | 1.4966040  | -0.1269100 |
| 2   | N      | 1  |    |    | 1.3882062 |             |              | 3.1067380  | 2.0179790  | -0.4064460 |
| 3   | C      | 2  | 1  |    | 1.2949552 | 102.0851121 |              | 2.8856510  | 3.2933240  | -0.3673990 |
| 4   | O      | 3  | 2  | 1  | 1.3378026 | 114.1871393 | 0.2725231    | 1.6196950  | 3.6218000  | -0.0860190 |
| 5   | N      | 1  | 2  | 3  | 1.3190781 | 114.104639  | 3            | 0.9235870  | 2.4101680  | 0.0863260  |
| 6   | C      | 1  | 5  | 4  | 1.4702387 | 124.0681016 | -179.0086056 | 1.6055280  | 0.0477050  | -0.0812050 |
| 7   | C      | 6  | 1  | 5  | 1.4953598 | 119.0199748 | -164.3778556 | 2.7721710  | -0.8830030 | 0.0127510  |
| 8   | N      | 6  | 1  | 5  | 1.2994488 | 116.3040767 | 14.8627205   | 0.3616180  | -0.3269110 | -0.1115010 |
| 9   | N      | 8  | 6  | 1  | 1.3314457 | 120.1572354 | -13.9825734  | -0.6092330 | 0.5595700  | 0.0990870  |
| 10  | C      | 9  | 8  | 6  | 1.3991917 | 121.2262715 | 179.8937809  | -1.9559610 | 0.1811770  | 0.0694260  |
| 11  | C      | 7  | 6  | 1  | 1.4052491 | 120.3588304 | -115.9615752 | 3.0482990  | -1.7832970 | -1.0302970 |
| 12  | C      | 11 | 7  | 6  | 1.3970573 | 120.5209997 | -179.1223423 | 4.1264970  | -2.6668990 | -0.9380710 |
| 13  | C      | 12 | 11 | 7  | 1.3974240 | 120.0878926 | 0.0811509    | 4.9404820  | -2.6627560 | 0.1978010  |
| 14  | C      | 13 | 12 | 11 | 1.3978548 | 119.7797422 | -0.1674257   | 4.6743020  | -1.7693560 | 1.2394260  |
| 15  | C      | 14 | 13 | 12 | 1.3960039 | 120.1831481 | 0.1308416    | 3.5976590  | -0.8854340 | 1.1480550  |
| 16  | C      | 10 | 9  | 8  | 1.4034049 | 121.7887441 | 1.5943841    | -2.3454390 | -1.1491920 | -0.1495960 |
| 17  | C      | 16 | 10 | 9  | 1.3935647 | 119.8180860 | 179.8089989  | -3.6987860 | -1.4811140 | -0.1669810 |
| 18  | C      | 17 | 16 | 10 | 1.3959414 | 120.0723959 | -0.0890918   | -4.6639990 | -0.4930360 | 0.0348060  |
| 19  | C      | 18 | 17 | 16 | 1.3947805 | 120.5583249 | 0.0649056    | -4.2874030 | 0.8319630  | 0.2538170  |
| 20  | C      | 19 | 18 | 17 | 1.3936479 | 119.4901186 | -0.0343289   | -2.9346930 | 1.1668240  | 0.2710840  |
| 21  | Cl     | 18 | 17 | 16 | 1.7600474 | 119.7753195 | -179.9381474 | -6.3710200 | -0.9212480 | 0.0128830  |
| 22  | H      | 3  | 2  | 1  | 1.0813152 | 128.4147110 | -179.6011863 | 3.5844650  | 4.1017370  | -0.5328380 |
| 23  | H      | 9  | 8  | 6  | 1.0172773 | 120.0722656 | 1.8861751    | -0.3805910 | 1.5383390  | 0.2558900  |
| 24  | H      | 11 | 7  | 6  | 1.0868089 | 119.5482670 | 2.2436011    | 2.4297050  | -1.7743800 | -1.9238380 |
| 25  | H      | 12 | 11 | 7  | 1.0861232 | 119.7295620 | -179.3525985 | 4.3345390  | -3.3500560 | -1.7564100 |
| 26  | H      | 13 | 12 | 11 | 1.0860340 | 120.1020903 | -179.8373107 | 5.7802880  | -3.3477260 | 0.2685960  |
| 27  | H      | 14 | 13 | 12 | 1.0860606 | 120.0939347 | -179.7039216 | 5.3065040  | -1.7584620 | 2.1224490  |
| 28  | H      | 15 | 14 | 13 | 1.0860669 | 119.9561195 | -179.6199851 | 3.3979180  | -0.1886310 | 1.9568260  |
| 29  | H      | 16 | 10 | 9  | 1.0831191 | 119.5274803 | -0.3337694   | -1.5886500 | -1.9081170 | -0.3059620 |
| 30  | H      | 17 | 16 | 10 | 1.0845894 | 119.9139634 | 179.9306027  | -4.0015610 | -2.5085750 | -0.3372320 |
| 31  | H      | 19 | 18 | 17 | 1.0843913 | 120.2707440 | 179.9369632  | -5.0411470 | 1.5959560  | 0.4090240  |
| 32  | H      | 20 | 19 | 18 | 1.0871229 | 119.4543054 | 179.8951808  | -2.6418710 | 2.2000300  | 0.4401310  |
